# Supplementary material
Source: Springer Nature journal article supplement (https://www.springermedizin.de/resource/supplementary/12943_2012_1102_MOESM14_ESM.pdf/9552504)

**A**

| <i>D6 conc.</i>  | <i>G0/G1</i> |                    | <i>S-phase</i> |      | <i>G2/M</i> |                   |
|------------------|--------------|--------------------|----------------|------|-------------|-------------------|
| 0 $\mu\text{M}$  | 56.94        | 6.3                | 31.36          | 9.8  | 11.00       | 4.1               |
| 5 $\mu\text{M}$  | 37.02        | 12.2 <sup>**</sup> | 41.32          | 20.2 | 21.65       | 8.4 <sup>*</sup>  |
| 10 $\mu\text{M}$ | 40.37        | 2.1 <sup>**</sup>  | 33.49          | 2.3  | 26.13       | 1.4 <sup>**</sup> |

**B**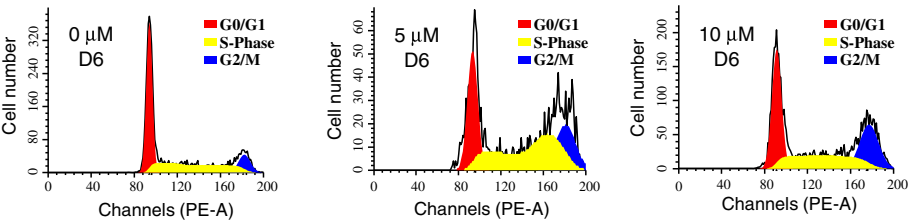

Supplement: MOESM14 [file 9552504]
